# Supplementary material
Source: publisher figshare collection journal article supplement (https://sage.figshare.com/ndownloader/files/14924213)
Supplement: Supplementary file 1 [file 14924213]

Supplement table 1 Comparison of fusion rates in two groups of patients at different time points

| Fusion rates            | 1 month after surgery |             |             | 6 months after surgery |             |             | Last follow-up |             |             |
|-------------------------|-----------------------|-------------|-------------|------------------------|-------------|-------------|----------------|-------------|-------------|
|                         | Grade 1 (%)           | Grade 2 (%) | Grade 3 (%) | Grade 1 (%)            | Grade 2 (%) | Grade 3 (%) | Grade 1 (%)    | Grade 2 (%) | Grade 3 (%) |
| Unilateral group (n=40) | 42.5                  | 55          | 2.5         | 77.5                   | 20          | 2.5         | 95             | 5           | 0           |
| Bilateral group (n=45)  | 53.3                  | 42.2        | 4.5         | 75.6                   | 22.2        | 2.2         | 93.3           | 6.7         | 0           |
| $\chi^2$ value          | 1.459                 |             |             | 0.067                  |             |             | 0.744          |             |             |
| P value                 | 0.482                 |             |             | 0.967                  |             |             | 1.000          |             |             |
